# Supplementary material for: Vaginal Progesterone Has No Diabetogenic Potential in Twin Pregnancies: A Retrospective Case-Control Study on 1686 Pregnancies
Source: MDPI journal article supplement (doi:10.3390/jcm9072249), 2020-07-15
Supplement: s1 [file s1]

## Supplementary

**Table S1.** Results of the binary logistic regression model for the prediction of gestational diabetes mellitus development in twin pregnancies

with spontaneous conception.

|                                        | <b>Women with GDM<br/>(n = 205)</b> | <b>Women without GDM<br/>(n = 907)</b> | <b>OR (95% CI)</b>   | <b>p</b> |
|----------------------------------------|-------------------------------------|----------------------------------------|----------------------|----------|
| Vaginal progesterone treatment         | 17 (8.3)                            | 65 (7.2)                               | 1.339 (0.724;2.474)  | 0.352    |
| Maternal age (years)                   | 31.9 ± 5.1                          | 30.96 ± 6.29                           | 1.039 (1.007;1.072)  | 0.017    |
| Pre-pregnancy BMI (kg/m <sup>2</sup> ) | 26.5 ± 6.0                          | 23.5 ± 4.6                             | 1.095 (1.062;1.129)  | <0.001   |
| Family history of diabetes             | 69 (33.7)                           | 204 (22.5)                             | 1.274 (0.888;1.828)  | 0.188    |
| Previous pregnancy with GDM            | 28 (13.7)                           | 14 (1.5)                               | 7.390 (3.558;15.348) | <0.001   |
| Betamethasone 12mg 2x within 24 hours  | 69 (33.7)                           | 368 (40.6)                             | 1.449 (0.654;3.212)  | 0.361    |
| Atosiban* for at least 48 hours        | 64 (31.2)                           | 357 (39.4)                             | 0.668 (0.296;1.506)  | 0.331    |
| Current smoking                        | 39 (19.0)                           | 101 (11.1)                             | 1.598(1.021; 2.502)  | 0.040    |

BMI: body mass index, OR: odds ratio, 95%CI: 95% confidence interval. Multivariate analyses included all parameters significant in the univariate analysis; \*In the atosiban group, women received a bolus injection of 6.75 mg intravenous in 1 min, followed by 18 mg/h. for 3 h, followed by a maintenance dosage of 6 mg/h for 45 h.
